# Supplementary material for: An ionothermally synthesized Mg-based coordination polymer as a precursor for preparing porous carbons
Source: Royal Society of Chemistry journal article supplement (doi:10.1039/c5ce00591d), 2015-01-01
Supplement: c5ce00591d1.pdf [file c5ce00591d1.pdf]

## Supporting Information

### **An ionothermally synthesized Mg-based coordination polymer as a precursor for preparing porous carbons**

Zhao-Feng Wu,<sup>a,b</sup> Bin Tan,<sup>a,b</sup> Cheng-Feng Du,<sup>a,b</sup> Mei-Ling Feng,<sup>a</sup> Zai-Lai Xie,<sup>c</sup> and Xiao-Ying Huang<sup>\*a</sup>

<sup>a</sup> State Key Laboratory of Structural Chemistry, Fujian Institute of Research on the structure of Matter, Chinese Academy of Sciences, Fuzhou, Fujian 350002, P.R. China

<sup>b</sup> University of Chinese Academy of Sciences, Beijing, 100049, P.R. China

<sup>c</sup> College of Chemistry, Fuzhou University, Fuzhou, Fujian 350002, P.R. China

\*Corresponding author, E-mail: [xyhuang@fjirsm.ac.cn](mailto:xyhuang@fjirsm.ac.cn). Fax: (+86) 591-63173145

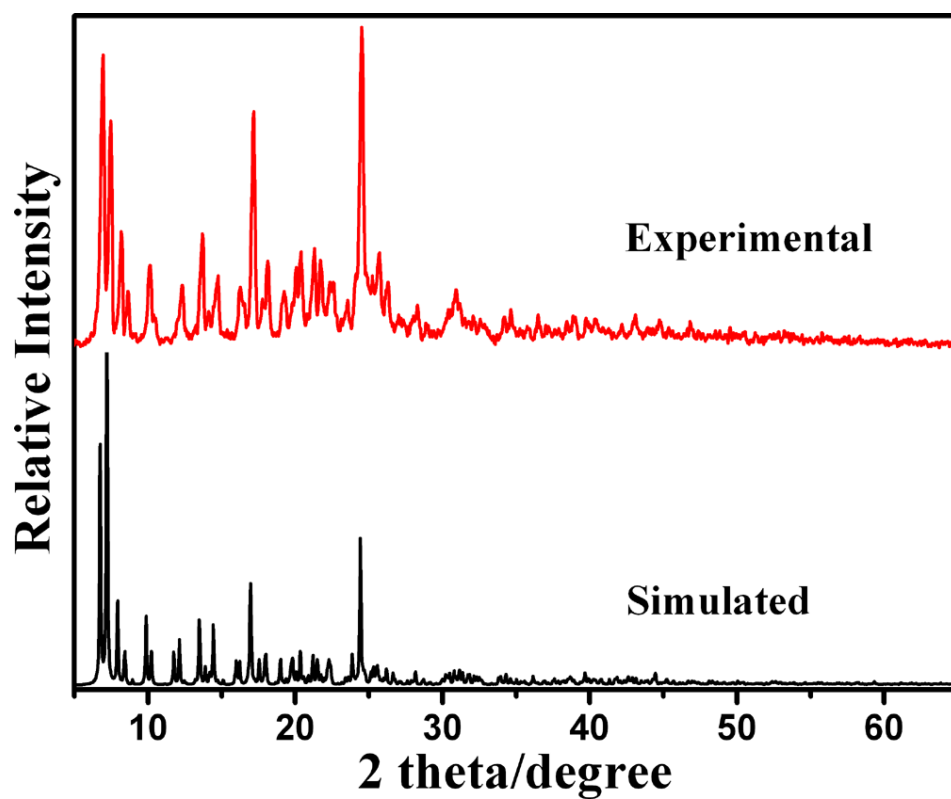

Fig. S1. The PXR D pattern of 1 is comparable to the simulated from the single crystal X-ray data.

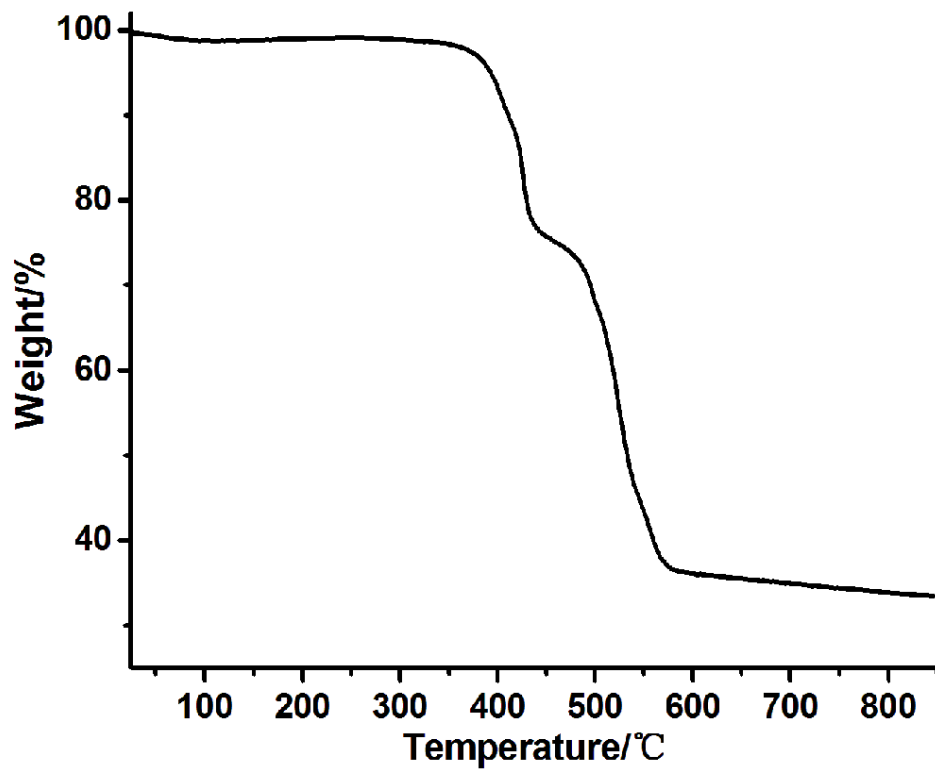

Fig. S2. Thermogravimetric curve of the title compound 1.
